# Supplementary material
Source: MDPI journal article supplement (https://www.mdpi.com/2306-5710/10/1/3)
Supplement: s1 [file s1]

Table S1. Content (µg/L) of minor volatile compounds in white and red wines studied.

| Compuesto                            | WHITE WINES          |                      |                      |                       |                        |                      | RED WINES             |                       |                      |                       |
|--------------------------------------|----------------------|----------------------|----------------------|-----------------------|------------------------|----------------------|-----------------------|-----------------------|----------------------|-----------------------|
|                                      | WC                   | WOX                  | WN <sub>2</sub>      | WAr                   | WCO <sub>2</sub>       | RC                   | ROX                   | RN <sub>2</sub>       | RAr                  | RCO <sub>2</sub>      |
| Ethyl butyrate                       | 353 ± 3.1 b          | 342 ± 1.2 ab         | 340 ± 11.3 ab        | 346 ± 5.1 b           | 330 ± 5.8 a            | 224 ± 0.2 a          | 219 ± 1.1 a           | 219 ± 30.8 a          | 232 ± 8.7 a          | 232 ± 1.2 a           |
| Ethyl hexanoate                      | 751 ± 0.4 ab         | 752 ± 4.7 ab         | 76 ± 18.9 b          | 738 ± 5.1 a           | 733 ± 5.2 a            | 353 ± 0.4 a          | 348 ± 5.0 a           | 359 ± 42.9 a          | 391 ± 6.5 a          | 356 ± 20.8 a          |
| Ethyl octanoate                      | 508 ± 1.0 c          | 503 ± 7.9 c          | 459 ± 7.5 b          | 470 ± 11.0 b          | 436 ± 13.2 a           | 220 ± 1.9 a          | 215 ± 3.8 a           | 212 ± 41.9 a          | 247 ± 10.3 a         | 232 ± 14.1 a          |
| Ethyl decanoate                      | 94.2 ± 1.0 b         | 84.2 ± 1.3 a         | 87.8 ± 6.2 ab        | 86.9 ± 2.8 ab         | 82.8 ± 4.6 a           | 76.7 ± 1.2 b         | 67.9 ± 3.1 ab         | 60.9 ± 10.7 a         | 70.7 ± 2.4 ab        | 74.0 ± 8.5 b          |
| Ethyl 2-methylbutyrate               | 19.0 ± 0.2           | 18.5 ± 0.1           | 18.3 ± 0.3           | 18.6 ± 0.2            | 17.6 ± 0.4             | 16.5 ± 0.1 a         | 16.5 ± 0.4 a          | 17.0 ± 3.3 a          | 18.9 ± 0.7 a         | 17.3 ± 0.2 a          |
| Ethyl isovalerate                    | 24.7 ± 0.1           | 23.6 ± 0.9           | 22.4 ± 0.3           | 21.1 ± 0.7            | 19.2 ± 0.4             | 12.9 ± 0.3 a         | 13.2 ± 0.8 a          | 12.9 ± 2.1 a          | 14.1 ± 0.6 a         | 13.9 ± 0.2 a          |
| <b>Total linear ethyl esters</b>     | <b>1707 ± 1.6</b>    | <b>1681 ± 3.3</b>    | <b>1648 ± 43.0</b>   | <b>1641 ± 22.6</b>    | <b>1581 ± 24.4</b>     | <b>874 ± 2.9 a</b>   | <b>850 ± 10.8 a</b>   | <b>851 ± 125.7 a</b>  | <b>941 ± 26.6 a</b>  | <b>894 ± 42.6 a</b>   |
| <b>Total branched ethyl esters</b>   | <b>43.8 ± 0.2</b>    | <b>42.1 ± 0.7</b>    | <b>40.7 ± 0.7</b>    | <b>39.7 ± 0.8</b>     | <b>36.8 ± 0.8</b>      | <b>29.4 ± 0.4 a</b>  | <b>29.7 ± 1.1 a</b>   | <b>29.9 ± 5.4 a</b>   | <b>33.0 ± 1.2 a</b>  | <b>31.2 ± 0.1 a</b>   |
| Propyl acetate                       | 42.6 ± 0.0 d         | 39.1 ± 0.9 cd        | 35 ± 1.1 ab          | 37.8 ± 1.0 bc         | 32.4 ± 3.3 a           | 57.5 ± 1.3 c         | 53.7 ± 1.6 bc         | 43.6 ± 2.4 a          | 44.3 ± 2.9 a         | 51.4 ± 3.8 b          |
| Isobutyl acetate                     | 18.9 ± 0.1 a         | 18 ± 0.4 a           | 17.7 ± 1.1 a         | 18.8 ± 0.5 a          | 17.4 ± 1.0 a           | 160.5 ± 1.9 c        | 153.4 ± 1.0 c         | 121.5 ± 8.1 a         | 112.5 ± 3.9 b        | 150.8 ± 4.9 c         |
| Butyl acetate                        | n.d.                 | n.d.                 | n.d.                 | n.d.                  | n.d.                   | 2.5 ± 0.1 c          | 2.0 ± 0.4 c           | 0.9 ± 0.3 b           | 1.1 ± 0.3 b          | 0.0 ± 0.0 a           |
| Isoamyl acetate                      | 421 ± 5.6 a          | 417 ± 18.9 a         | 420 ± 23.4 a         | 397 ± 23.2 a          | 389 ± 22.4 a           | 488 ± 25.2 ab        | 476 ± 0.6 ab          | 445 ± 63.9 a          | 455 ± 13.4 a         | 518 ± 26.6 b          |
| Hexyl acetate                        | 20 ± 0.2 a           | 20.1 ± 0.0 a         | 20.1 ± 0.3 a         | 21.1 ± 0.4 b          | 19.8 ± 0.5 a           | 4.3 ± 0.1 b          | 4.3 ± 0.1 b           | 3.4 ± 0.3 a           | 3.3 ± 0.1 a          | 4.1 ± 0.1 b           |
| β-Phenethyl acetate                  | 23.3 ± 0.2 a         | 23.4 ± 2.0ab         | 25.4 ± 1.5 abc       | 25.6 ± 1.0 bc         | 25.7 ± 0.6c            | 29.3 ± 1.0 bc        | 29.4 ± 1.0 bc         | 27.7 ± 0.6 ab         | 27.0 ± 0.8 a         | 30.5 ± 1.6 c          |
| <b>Total alcohol acetates</b>        | <b>525 ± 5.6 a</b>   | <b>518 ± 19.6 a</b>  | <b>519 ± 24.8 a</b>  | <b>500 ± 25.6 a</b>   | <b>485 ± 25.7 a</b>    | <b>684 ± 27.9 b</b>  | <b>665 ± 0.9 ab</b>   | <b>598 ± 72.5 a</b>   | <b>598 ± 18.0 a</b>  | <b>704 ± 23.0 b</b>   |
| 1-Hexanol                            | 1903 ± 0.8 a         | 1854 ± 51.6 a        | 2064 ± 63.1 c        | 1959 ± 14.9 ab        | 2032 ± 96.9 bc         | 2216 ± 66.5 a        | 2282 ± 145.9 a        | 2330 ± 218.8 a        | 2346 ± 83.9 a        | 2395 ± 130.2 a        |
| <i>Trans</i> -3-Hexen-1-ol           | 200 ± 1.9 a          | 196 ± 9.2 a          | 221 ± 6.5 b          | 210 ± 2.0 ab          | 223 ± 13.2 b           | 53.1 ± 1.4 a         | 54.7 ± 2.6 a          | 70.3 ± 10.9 bc        | 76.8 ± 2.3 c         | 63.5 ± 3.9 ab         |
| <i>Cis</i> -3-Hexen-1-ol             | 203 ± 1.2 a          | 198 ± 6.8 a          | 221 ± 5.5 b          | 212 ± 1.2 ab          | 221 ± 13.7 b           | 286 ± 11.2 ab        | 294 ± 3.1 b           | 276 ± 25.7 ab         | 250 ± 10.9 a         | 303 ± 23.9 b          |
| <b>Total alcoholes C<sub>6</sub></b> | <b>2306 ± 3.9 a</b>  | <b>2248 ± 67.7 a</b> | <b>2506 ± 75.1 c</b> | <b>2381 ± 16.7 ab</b> | <b>2476 ± 123.6 bc</b> | <b>2555 ± 79.1 a</b> | <b>2631 ± 180.2 a</b> | <b>2676 ± 253.1 a</b> | <b>2673 ± 95.9 a</b> | <b>2761 ± 157.2 a</b> |
| Linalool                             | 1.08 ± 0.03 ab       | 1.06 ± 0.02 ab       | 1.04 ± 0.06 a        | 1.14 ± 0.06 b         | 1.06 ± 0.06 ab         | 3.97 ± 0.13 c        | 3.89 ± 0.03 bc        | 3.55 ± 0.14 ab        | 3.43 ± 0.09 a        | 3.80 ± 0.32 bc        |
| α-Terpineol                          | 2.82 ± 0.00 a        | 3.02 ± 0.13 a        | 3.03 ± 0.13 a        | 3.26 ± 0.13 b         | 3.04 ± 0.12 a          | 3.16 ± 0.04 b        | 3.20 ± 0.10 b         | 3.01 ± 0.11 b         | 2.80 ± 0.11 a        | 2.96 ± 0.18 ab        |
| Citronellol                          | 0.271 ± 0.01 bc      | 0.178 ± 0.01 a       | 0.216 ± 0.01 ab      | 0.304 ± 0.06 b        | 0.219 ± 0.02 ab        | 2.06 ± 0.12 b        | 1.81 ± 0.05 a         | 1.82 ± 0.06 a         | 1.79 ± 0.04 a        | 1.87 ± 0.07 a         |
| Geraniol                             | n.d.                 | n.d.                 | n.d.                 | n.d.                  | n.d.                   | 0.33 ± 0.00 b        | 0.32 ± 0.01 b         | 0.31 ± 0.01 b         | 0.28 ± 0.01 a        | 0.32 ± 0.03 b         |
| <b>Total terpenes</b>                | <b>4.17 ± 0.04 a</b> | <b>4.26 ± 0.14 a</b> | <b>4.29 ± 0.18 a</b> | <b>4.71 ± 0.23 b</b>  | <b>4.32 ± 0.16 a</b>   | <b>9.52 ± 0.29 c</b> | <b>9.22 ± 0.08 bc</b> | <b>8.69 ± 0.31 ab</b> | <b>8.30 ± 0.21 a</b> | <b>8.95 ± 0.58 bc</b> |
| Vanillin                             | 35.4 ± 1.5 a         | 36.9 ± 3.1 a         | 39.1 ± 6.1 a         | 38.1 ± 17.1 a         | 24.3 ± 4.2 a           | 57.2 ± 5.95 a        | 105.7 ± 45.5 bc       | 114.0 ± 15.6 c        | 113.6 ± 1.07 c       | 78.3 ± 14.0 ab        |
| Methyl vanillate                     | 18.9 ± 2.1 b         | 19 ± 2.2 b           | 17.8 ± 1.2 b         | 18.4 ± 0.5 b          | 14.8 ± 1.2 a           | 4.29 ± 0.70 a        | 5.59 ± 0.78 ab        | 6.88 ± 0.84 b         | 5.49 ± 0.23 a        | 5.25 ± 1.02 a         |
| Ethyl vanillate                      | 25.3 ± 0.5 c         | 22.5 ± 0.4 ab        | 24.4 ± 0.9 bc        | 25.1 ± 1.6 c          | 21.8 ± 0.2 a           | 203 ± 3.69 a         | 216 ± 4.23 a          | 284 ± 32.9 b          | 306 ± 9.68 b         | 240 ± 15.1 a          |
| Acetovanillone                       | 159 ± 7.2 c          | 132 ± 7.0 b          | 143 ± 4.2 b          | 140 ± 10.3 b          | 109 ± 5.9 a            | 111 ± 7.66 a         | 137 ± 0.72 c          | 126 ± 3.64 b          | 112 ± 2.81 a         | 124 ± 6.04 b          |
| <b>Total vanillic derivatives</b>    | <b>239 ± 8.2 b</b>   | <b>210 ± 12.7 b</b>  | <b>224 ± 9.3 b</b>   | <b>221 ± 23.0 b</b>   | <b>170 ± 9.2 a</b>     | <b>375 ± 18 a</b>    | <b>464 ± 51 b</b>     | <b>531 ± 41 c</b>     | <b>537 ± 13 c</b>    | <b>448 ± 32 b</b>     |
| Guaiaicol                            | 0.384 ± 0.02 b       | 0.245 ± 0.02 a       | 0.275 ± 0.03 a       | 0.352 ± 0.03 b        | 0.349 ± 0.06 b         | 6.54 ± 0.33 a        | 6.81 ± 0.12 ab        | 7.54 ± 0.51 c         | 8.52 ± 0.27 d        | 7.23 ± 0.18bc         |
| 4-methylguaiaicol                    | n.d.                 | n.d.                 | n.d.                 | n.d.                  | n.d.                   | 1.35 ± 0.02 a        | 1.36 ± 0.03 a         | 2.42 ± 0.04b          | 3.11 ± 0.10 c        | 1.64 ± 0.10 a         |
| 4-Propylguaiaicol                    | n.d.                 | n.d.                 | n.d.                 | n.d.                  | n.d.                   | 0.72 ± 0.02 a        | 0.85 ± 0.02 a         | 2.82 ± 0.75 b         | 3.85 ± 0.10 c        | 1.43 ± 0.20 a         |
| Eugenol                              | 1.98 ± 0.1 b         | 1.88 ± 0.0 a         | 1.9 ± 0.0 a          | 1.96 ± 0.1 b          | 1.9 ± 0.0 a            | 16.8 ± 0.17 a        | 16.7 ± 0.04 a         | 18.1 ± 0.87 bc        | 18.3 ± 0.16 c        | 17.5 ± 0.16 ab        |
| Syringol                             | n.d.                 | n.d.                 | n.d.                 | n.d.                  | n.d.                   | 16.6 ± 0.12 a        | 21.7 ± 0.21b          | 24.9 ± 3.32 b         | 24.5 ± 0.92 b        | 22.3 ± 1.23 b         |
| <b>Total volatile phenols</b>        | <b>2.36 ± 0.08 b</b> | <b>2.12 ± 0.02 a</b> | <b>2.18 ± 0.07 a</b> | <b>2.32 ± 0.08 b</b>  | <b>2.25 ± 0.08 ab</b>  | <b>42.0 ± 0.03 a</b> | <b>47.4 ± 0.31 ab</b> | <b>55.8 ± 5.81 b</b>  | <b>58.3 ± 0.78 b</b> | <b>50.0 ± 1.40 b</b>  |
| 2-methylbutanal                      | 7.64 ± 0.1 a         | 8.07 ± 0.2 ab        | 9.39 ± 0.7bc         | 9.64 ± 0.4 c          | 8.28 ± 1.1 ab          | 16.4 ± 0.73 ab       | 15.0 ± 0.61 a         | 19.3 ± 0.72 cd        | 21.0 ± 1.71 d        | 17.7 ± 1.87 bc        |
| 3-methylbutanal                      | 47.4 ± 1.4 a         | 43.9 ± 0.9 a         | 54.6 ± 2.0 b         | 47 ± 3.8 a            | 53.6 ± 2.7 b           | 43.5 ± 0.19 a        | 43.6 ± 1.75a          | 50.1 ± 1.42 b         | 58.3 ± 4.95 c        | 51.1 ± 3.81 b         |
| Isobutyraldehyde                     | 20.8 ± 0.2 b         | 16.8 ± 0.1 a         | 22.1 ± 1.1 b         | 22.2 ± 0.3 b          | 24.1 ± 1.5 c           | 32.3 ± 0.96 a        | 34.3 ± 0.91a          | 45.9 ± 3.14 b         | 50.3 ± 0.98 c        | 44.6 ± 4.33 b         |
| Phenylacetaldehyde                   | 11.8 ± 0.0 b         | 11.3 ± 0.7 ab        | 11.1 ± 1.0 ab        | 10.8 ± 0.3 ab         | 10.5 ± 0.7 a           | 34.8 ± 0.07 a        | 32.2 ± 2.59 a         | 34.1 ± 4.13 a         | 34.7 ± 2.97 a        | 34.7 ± 4.51 a         |
| <b>Total Strecker aldehydes</b>      | <b>87.6 ± 1.5 b</b>  | <b>80.1 ± 1.3 a</b>  | <b>97.1 ± 4.1 c</b>  | <b>89.7 ± 3.4 b</b>   | <b>96.5 ± 2.4 c</b>    | <b>127 ± 0.50 a</b>  | <b>125 ± 2.36 ab</b>  | <b>149 ± 6.14 c</b>   | <b>164 ± 7.14 c</b>  | <b>148 ± 7.46 b</b>   |

n.d. Not detected.

White wine control (WC); white wine oxygenated (WOX); white wine sparged with N<sub>2</sub> (WN<sub>2</sub>); white wine sparged with argon (WAr); white wine sparged with CO<sub>2</sub> (WCO<sub>2</sub>). Red wine control (RC); red wine oxygenated (ROX); red wine sparged with N<sub>2</sub> (RN<sub>2</sub>); red wine sparged with argon (RAr); red wine sparged with CO<sub>2</sub> (RCO<sub>2</sub>).

Different letters in the same row indicate statistically significant differences.
